# Supplementary material for: Arabidopsis SUC1 loads the phloem in suc2 mutants when expressed from the SUC2 promoter
Source: PubMed Central journal article supplement — J Exp Bot. 2011 Oct 21;63(2):669–79. doi: 10.1093/jxb/err255 (PMC3254675; doi:10.1093/jxb/err255), 2011-10-21
Supplement: supp_err255_00065698_file001.pdf [file supp_err255_00065698_file001.pdf]

## SUPPORTING INFORMATION

(Kathrin Wippel and Norbert Sauer)

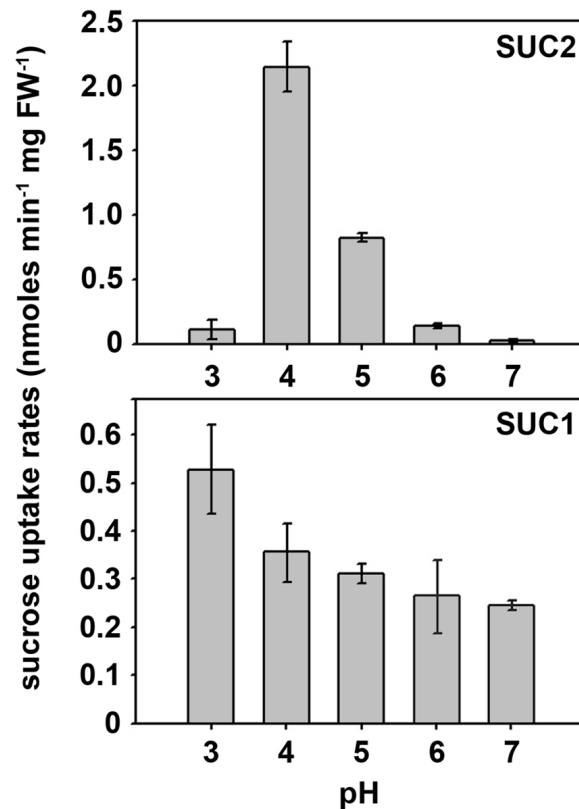

**Fig. S1.** Comparison of the pH-dependence of sucrose uptake in baker's yeast (*Saccharomyces cerevisiae*) expressing *SUC1* or *SUC2*. The constructs for expression of *SUC1* (in strain DBY2617) or *SUC2* (in strain SEY6210) and the growth conditions were as described (Sauer and Stolz, 1994). In this paper, the pH-dependence has been analysed only from pH 5 to pH 7. Here we compared the pH-dependence from pH 3 to 7. Transport was measured at pH 3, 4 and 5 in citrate buffer and at pH 5, 6 and 7 in phosphate buffer. All measurements were performed with 0.1 mM <sup>14</sup>C-labelled sucrose in the presence of 10 mM glucose (n = 3 ± SD).

### Reference

**Sauer N, Stolz J.** 1994. SUC1 and SUC2: two sucrose transporters from *Arabidopsis thaliana*; expression and characterization in baker's yeast and identification of the histidine-tagged protein. *The Plant Journal* **6**, 67-77.
